# Supplementary material for: Investigation of the position of the radical in z3-ions resulting from electron transfer dissociation using infrared ion spectroscopy
Source: Royal Society of Chemistry journal article supplement (doi:10.1039/c8fd00202a), 2018-12-11
Supplement: c8fd00202a1.pdf [file c8fd00202a1.pdf]

## Investigation of the position of the radical in $z_3$ -ions resulting from electron transfer dissociation using Infrared Ion Spectroscopy

Lisanne J.M. Kempkes,<sup>1</sup> Jonathan Martens,<sup>1</sup> Giel Berden,<sup>1</sup> Kas J. Houthuijs,<sup>1</sup> Jos Oomens<sup>1,2,\*</sup>

<sup>1</sup>*Radboud University, FELIX laboratory, Toernooiveld 7c, 6525 ED Nijmegen, The Netherlands*

<sup>2</sup>*Van 't Hoff Institute for Molecular Sciences, University of Amsterdam, Science Park 904, 1098 XH Amsterdam, the Netherlands*

### Supplementary Information

The additional figures show the comparison between the experimental spectra of the  $z_3$ -ions of [AAAAAAK+2H]<sup>2+</sup> and [AAAAFAK+2H]<sup>2+</sup> (Figure S1) and of [KAHA+2H]<sup>2+</sup> (Figure S2) with calculated spectra where the radical is positioned at the C $\beta$ -atom of the second residue counted from the C-terminus. This is an alanine residue in Figure S1 and a histidine residue in Figure S2. Table S1 lists the calculated relative Gibbs energies for all presented  $z$ -ion structures at three different levels of theory (B3LYP, B3LYPD and M06-2X).

**Supplementary Information Table S1.** Overview of relative energies of the z-ions with radicals positioned at the  $C_\alpha$ ,  $C_\beta$  and  $C_\gamma$  positions of the first, second and third residue (counted from the C-terminus). The energies are computed at the B3LYP, MP2, B3LYPD and M06-2X levels of theory.

| <b>B3LYP</b>       | 3 <sup>rd</sup> residue |           |            | 2 <sup>nd</sup> residue |           | 1 <sup>st</sup> residue |
|--------------------|-------------------------|-----------|------------|-------------------------|-----------|-------------------------|
| Peptide   fragment | $C_\alpha$              | $C_\beta$ | $C_\gamma$ | $C_\alpha$              | $C_\beta$ | $C_\alpha$              |
| AAAA   AAK         | + 21                    | + 63      | -          | 0                       | + 71      | +1*                     |
| AAAA   FAK         | + 32                    | + 3       | + 102      | 0                       | + 64      | +8*                     |
| AAAA   HAK         | + 22                    | + 17      | + 153      | + 8                     | + 68*     | 0*                      |
| AAAA   WAK         | + 31                    | +2        | -          | 0                       | + 72*     | +56*                    |
| AAAA   YAK         | + 33                    | 0         | + 111      | + 15                    | + 77*     | +7*                     |
| K   AHA            | + 15                    | + 66*     | -          | 0*                      | + 11*     | + 17*                   |

| <b>B3LYP-D</b> | 3 <sup>rd</sup> residue |           |            | 2 <sup>nd</sup> residue |           | 1 <sup>st</sup> residue |
|----------------|-------------------------|-----------|------------|-------------------------|-----------|-------------------------|
| Peptide:       | $C_\alpha$              | $C_\beta$ | $C_\gamma$ | $C_\alpha$              | $C_\beta$ | $C_\alpha$              |
| AAAA   AAK     | +17                     | +58       | -          | +3                      | + 63      | 0*                      |
| AAAA   FAK     | + 32                    | +2        | + 105      | <b>0</b>                | + 63      | +14*                    |
| AAAA   HAK     | + 16                    | + 8       | + 147      | + 6                     | + 63*     | 0*                      |
| AAAA   WAK     | + 26                    | 0         | -          | 0                       | + 63*     | +51*                    |
| AAAA   YAK     | + 36                    | 0         | + 108      | + 19                    | + 74*     | +12*                    |
| K   AHA        | + 13                    | + 62      |            | 0                       | + 10*     | + 17*                   |

| <b>M06-2X</b> | 3 <sup>rd</sup> residue |           |            | 2 <sup>nd</sup> residue |           | 1 <sup>st</sup> residue |
|---------------|-------------------------|-----------|------------|-------------------------|-----------|-------------------------|
| Peptide:      | $C_\alpha$              | $C_\beta$ | $C_\gamma$ | $C_\alpha$              | $C_\beta$ | $C_\alpha$              |
| AAAA   AAK    | <b>+ 13</b>             | + 51      |            | <b>+ 8</b>              | + 56      | +0*                     |
| AAAA   FAK    | + 32                    | +5        | +95        | <b>0</b>                | + 58      | +16*                    |
| AAAA   HAK    | +15                     | +12       | +142       | +8                      | + 63*     | <b>0*</b>               |
| AAAA   WAK    | + 28                    | + 9       |            | <b>0</b>                | + 63*     | +50*                    |
| AAAA   YAK    | + 33                    | <b>0</b>  | + 93       | + 21                    | + 68*     | +10*                    |
| K   AHA       | + 12                    | + 61      |            | <b>0</b>                | + 14*     | + 17*                   |

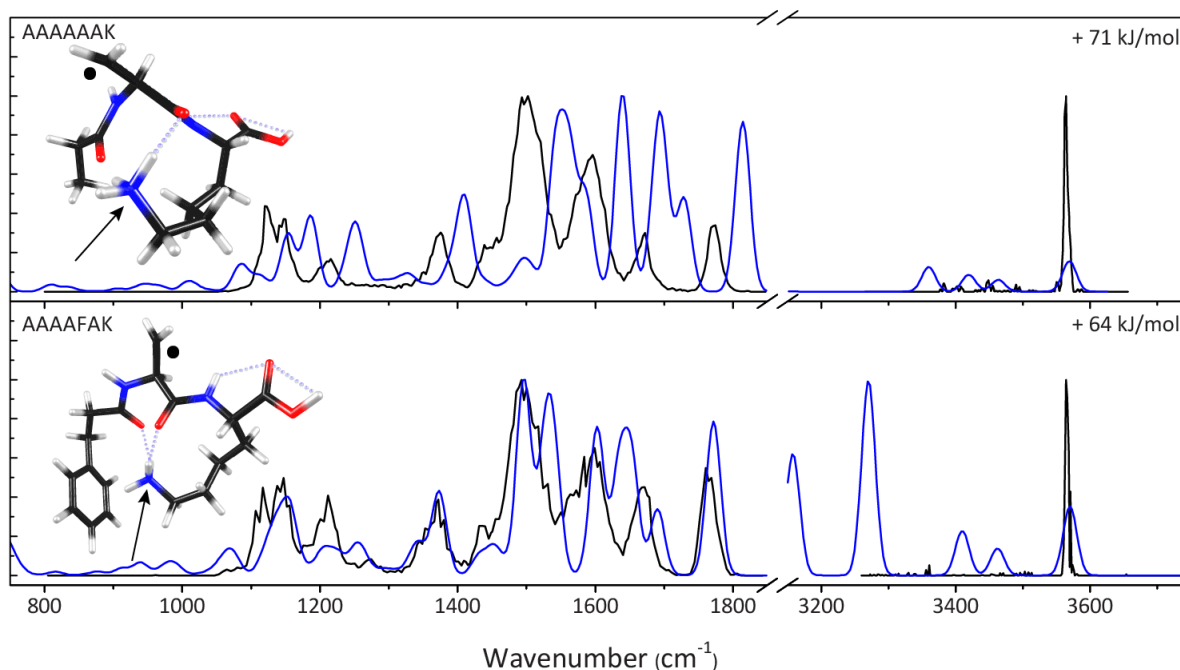

**Supporting Information Figure S1.** Experimental spectra of the  $z_3$ -ions from  $[AAAAAAK+2H]^{2+}$  and  $[AAAAHAK]^{2+}$  (black) compared with calculated spectra (blue) for structures with the radical at the  $C_\beta$  position of the second residue (Ala). These structures are relatively high in energy due to the absence of resonance stabilization of the radical.

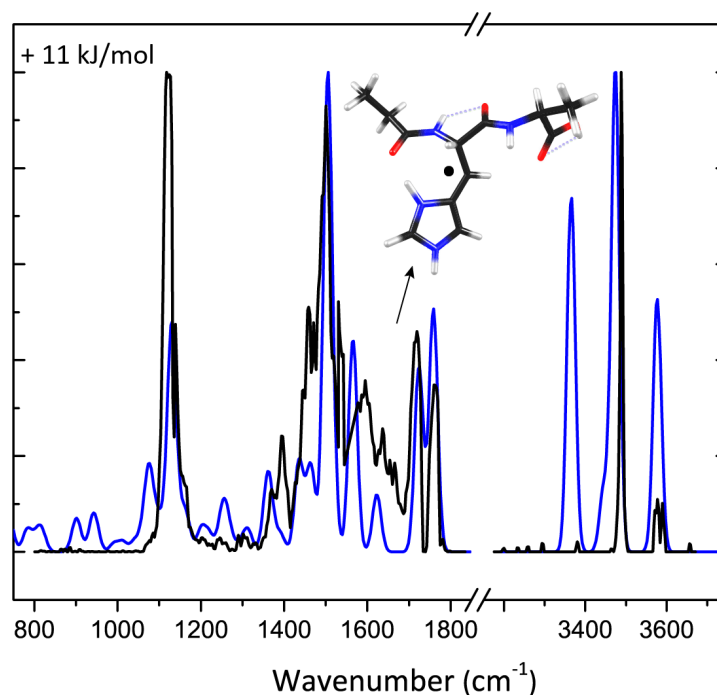

**Supporting Information Figure S2.** The calculated spectrum (blue) for radical migration to the  $C_\beta$  position of the second residue (histidine) compared with the experimental spectrum (black) of the  $z_3$ -ion from  $[KAHA+2H]^{2+}$ .
